# Supplementary material for: Long-term experimental evolution in Escherichia coli. XI. Rejection of non-transitive interactions as cause of declining rate of adaptation
Source: Springer Nature journal article supplement (doi:10.1186/1471-2148-2-19), 2002-10-30
Supplement: Additional file 1 [file 1471-2148-2-19-s1.pdf]

## Fitness values and defining features of the transitive and non-transitive models

### Transitive Model

|            | vs. ancestor | vs. 5K clone | vs. 10K clone | vs. 15K clone | vs. 20K clone |
|------------|--------------|--------------|---------------|---------------|---------------|
| Ancestor   | 1.0000       | 0.6757       | 0.6173        | 0.5917        | 0.5814        |
| 5K sample  | 1.4800       | 1.0000       | 0.9136        | 0.8757        | 0.8605        |
| 10K sample | 1.6200       | 1.0946       | 1.0000        | 0.9586        | 0.9419        |
| 15K sample | 1.6900       | 1.1419       | 1.0432        | 1.0000        | 0.9826        |
| 20K sample | 1.7200       | 1.1622       | 1.0617        | 1.0178        | 1.0000        |

### Non-Transitive Model

|            | vs. ancestor | vs. 5K clone | vs. 10K clone | vs. 15K clone | vs. 20K clone |
|------------|--------------|--------------|---------------|---------------|---------------|
| Ancestor   | 1.0000       | 0.6757       | 0.6173        | 0.5917        | 0.5814        |
| 5K sample  | 1.4800       | 1.0000       | 0.6757        | 0.6173        | 0.5917        |
| 10K sample | 1.6200       | 1.4800       | 1.0000        | 0.6757        | 0.6173        |
| 15K sample | 1.6900       | 1.6200       | 1.4800        | 1.0000        | 0.6757        |
| 20K sample | 1.7200       | 1.6900       | 1.6200        | 1.4800        | 1.0000        |

#### Features that are shared by the two models:

1. The models have identical first columns, which exhibit the decelerating fitness trajectory relative to the ancestor. [Values are the previously measured means of 12 populations.]
2. All of the diagonal elements are unity.
3. Each  $W(i:i) = 1 / W(j:i)$ . [However, the actual values differ owing to the distinguishing features below.]

#### Features that distinguish the two models:

4. In the transitive model,  $W(k:j) = W(k:i) / W(j:i)$  for all  $i, j, k$ .
5. In the non-transitive model, the elements in the same off-diagonal are equal, such that  $W(j:i) = W(j-1:i-1)$  for  $i, j$  both  $> 1$ .

From: De Visser and Lenski, 2002, *BMC Evolutionary Biology*.
